# Supplementary material for: SureSelect targeted enrichment, a new cost effective method for the whole genome sequencing of Candidatus Liberibacter asiaticus
Source: PubMed Central journal article supplement (PMC6908597; doi:10.1038/s41598-019-55144-4), 2019-12-12
Supplement: 41598_2019_55144_MOESM1_ESM.pdf [file 41598_2019_55144_MOESM1_ESM.pdf]

**Supplemental Information for:**

**SureSelect targeted enrichment, a new cost effective method for the whole genome sequencing of *Candidatus Liberibacter asiaticus***

**Weili Cai<sup>1,2</sup>, Schyler Nunziata<sup>1</sup>, John Rascoe<sup>1</sup>, and Michael J. Stulberg<sup>1\*</sup>**

**<sup>1</sup>Science and Technology, Plant Protection and Quarantine, Animal and Plant Health Inspection Service, United States Department of Agriculture, Beltsville, Maryland, United States of America**

**<sup>2</sup>Department of Entomology and Plant Pathology, North Carolina State University, Raleigh, North Carolina, United States of America**

**\*E-mail: [Michael.Stulberg@usda.gov](mailto:Michael.Stulberg@usda.gov)**

## Supplemental

Table S1. '*Ca. Liberibacter asiaticus*' sequences used for SureSelect target enrichment probe design.

| Strain      | RefSeq ID     | Chr Start | Chr End |
|-------------|---------------|-----------|---------|
| Ishi        | NZ_AP014595_1 | 0         | 1190853 |
| phage_JXGC3 | KY661963      | 0         | 31449   |
| phage_SC1   | NC_019549     | 0         | 40048   |
| phage_SC2   | NC_019550     | 0         | 38997   |
| Psy62       | NC_012985_3   | 507161    | 507281  |
| Psy62       | NC_012985_3   | 983884    | 984004  |
| Psy62       | NC_012985_3   | 1081694   | 1081814 |
| Psy62       | NC_012985_3   | 1220451   | 1220571 |
| gxpsy       | NC_020549_1   | 492225    | 492345  |
| gxpsy       | NC_020549_1   | 945617    | 945857  |
| gxpsy       | NC_020549_1   | 1067993   | 1068113 |
| gxpsy       | NC_020549_1   | 1120798   | 1123438 |
| gxpsy       | NC_020549_1   | 1189164   | 1189644 |
| gxpsy       | NC_020549_1   | 1265215   | 1265455 |
| A4          | NZ_CP010804_1 | 200781    | 200901  |
| A4          | NZ_CP010804_1 | 206064    | 206184  |
| A4          | NZ_CP010804_1 | 206307    | 206427  |
| A4          | NZ_CP010804_1 | 366926    | 367046  |
| A4          | NZ_CP010804_1 | 500965    | 501085  |
| A4          | NZ_CP010804_1 | 583427    | 583787  |
| A4          | NZ_CP010804_1 | 673930    | 674170  |
| A4          | NZ_CP010804_1 | 716898    | 717018  |
| A4          | NZ_CP010804_1 | 796941    | 797181  |
| A4          | NZ_CP010804_1 | 1015512   | 1015992 |
| A4          | NZ_CP010804_1 | 1067840   | 1069760 |
| A4          | NZ_CP010804_1 | 1079582   | 1079702 |
| A4          | NZ_CP010804_1 | 1081228   | 1081348 |
| A4          | NZ_CP010804_1 | 1132389   | 1135029 |
| A4          | NZ_CP010804_1 | 1200996   | 1201356 |
| A4          | NZ_CP010804_1 | 1201567   | 1201687 |
| A4          | NZ_CP010804_1 | 1205167   | 1205287 |
| A4          | NZ_CP010804_1 | 1208766   | 1209366 |
| A4          | NZ_CP010804_1 | 1209596   | 1209836 |
| A4          | NZ_CP010804_1 | 1219099   | 1219459 |
| A4          | NZ_CP010804_1 | 1220511   | 1220631 |
| A4          | NZ_CP010804_1 | 1224181   | 1224781 |
| A4          | NZ_CP010804_1 | 1228154   | 1228394 |
| A4          | NZ_CP010804_1 | 1229114   | 1229234 |
| A4          | NZ_CP010804_1 | 1229701   | 1229821 |

|      |               |         |         |
|------|---------------|---------|---------|
| JXGC | NZ_CP019958_1 | 500944  | 501064  |
| JXGC | NZ_CP019958_1 | 649058  | 649178  |
| JXGC | NZ_CP019958_1 | 796921  | 797161  |
| JXGC | NZ_CP019958_1 | 1067812 | 1069732 |
| JXGC | NZ_CP019958_1 | 1079554 | 1079674 |
| JXGC | NZ_CP019958_1 | 1132370 | 1135010 |

---

Table S2. HLB genomes downloaded from GenBank and used in Phylogeny construction.

| <b>Strain</b> | <b>Date Downloaded</b> | <b>Assembly</b> | <b>Level</b>  |
|---------------|------------------------|-----------------|---------------|
| Pys62         | 5/8/2018               | GCA_000023765.2 | complete      |
| Gxpsy         | 5/22/2018              | GCA_000346595.1 | complete      |
| A4            | 5/22/2018              | GCA_000590865.2 | complete      |
| Ishi-1        | 5/22/2018              | GCA_000829355.1 | complete      |
| JXGC          | 5/22/2018              | GCA_002216815.1 | complete      |
| FL17          | 5/22/2018              | GCA_000820625.1 | 3 scaffolds   |
| YCPsy         | 5/22/2018              | GCA_001296945.1 | 9 scaffolds   |
| SGCA5         | 5/22/2018              | GCA_001430705.1 | 56 scaffolds  |
| TX2351        | 5/22/2018              | GCA_001969535.1 | 71 scaffolds  |
| AHCA1         | 5/29/2018              | GCA_003143875.1 | 1 scaffold    |
| TX1712        | 7/16/2018              | GCA_003160765.1 | 48 scaffolds  |
| SGCA1*        | 5/29/2018              | GCA_003149415.1 | 606 scaffolds |
| HHCA*         | 5/22/2018              | GCA_000724755.2 | 239 scaffolds |

Table S3. Summary of reads kept after BBDuk filtering.

| <b>Sample ID</b> | <b>Cq Value (CLas)</b> | <b>Enrichment</b> | <b>Total Reads</b> | <b>After Filtering</b> | <b>Percentage Kept</b> |
|------------------|------------------------|-------------------|--------------------|------------------------|------------------------|
| LHCA20           | 20.1                   | Yes               | 5,376,070          | 2,634,608              | 49.00%                 |
|                  |                        | No                | 6,305,158          | 6,109,250              | 96.90%                 |
| LHCA22           | 22.84                  | Yes               | 5,600,568          | 3,486,268              | 62.20%                 |
|                  |                        | No                | 7,302,226          | 7,069,576              | 96.80%                 |
| LHCA26           | 26.84                  | Yes               | 5,428,586          | 3,299,660              | 60.80%                 |
|                  |                        | No                | 7,321,760          | 7,102,694              | 97.00%                 |
| LHCA28           | 28.52                  | Yes               | 5,801,194          | 3,277,008              | 56.50%                 |
|                  |                        | No                | 4,155,700          | 4,019,510              | 96.70%                 |
| SGCA20           | 20.61                  | Yes               | 2,121,652          | 1,467,124              | 69.20%                 |
|                  |                        | No                | 7,255,450          | 6,888,648              | 94.90%                 |
| SGCA22           | 22.16                  | Yes               | 4,928,054          | 3,093,380              | 62.80%                 |
|                  |                        | No                | 7,719,964          | 7,450,500              | 96.50%                 |

Table S4. Number of SNPs shared in particular combination of all samples as calculated using vcftools and --diff-site option. In parenthesis, number of SNPs unique to particular combination of samples as calculated using vcf-compare.

|        | LHCA20   | LHCA22   | LHCA26  | LHCA28   | <b>SGCA20</b> | <b>SGCA22</b> |
|--------|----------|----------|---------|----------|---------------|---------------|
| LHCA20 | 707 (31) | -        | -       | -        | -             | -             |
| LHCA22 | 613 (19) | 645 (18) | -       | -        | -             | -             |
| LHCA26 | 618 (6)  | 576 (1)  | 654 (9) | -        | -             | -             |
| LHCA28 | 589 (3)  | 550 (0)  | 588 (5) | 624 (12) | -             | -             |
| SGCA20 | 318 (1)  | 284 (1)  | 308 (0) | 295 (2)  | 735 (35)      | -             |
| SGCA22 | 297 (0)  | 291 (3)  | 290 (1) | 269 (0)  | 648 (0)       | 708 (40)      |

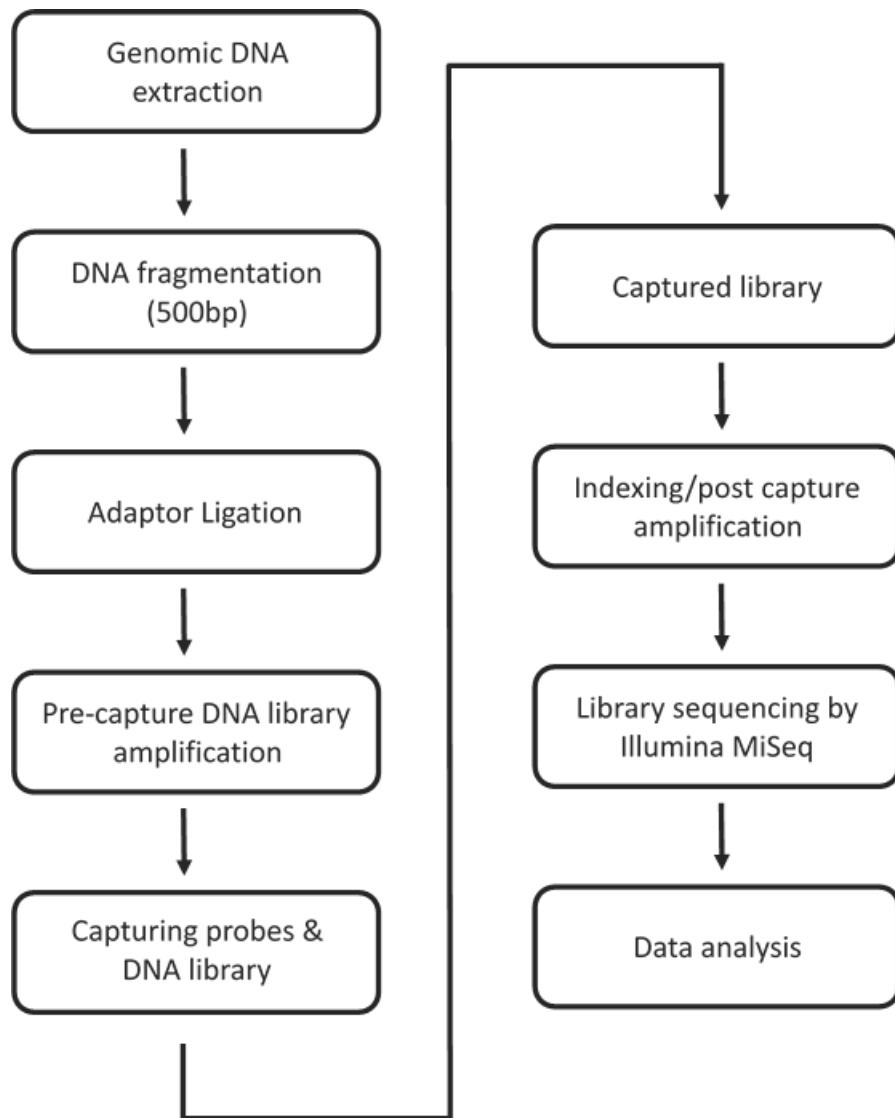

Figure S1. Work flow for SureSelect target enrichment of '*Ca. Liberibacter asiaticus*'.
